# Supplementary material for: “Duckweed-Microbe Co-Cultivation Method” for Isolating a Wide Variety of Microbes Including Taxonomically Novel Microbes
Source: PubMed Central journal article supplement (PMC6308005; doi:10.1264/jsme2.me18067), 2018-11-07
Supplement: 33_402_s1.pdf [file 33_402_s1.pdf]

**Table S1.** Phylogenetic affiliations of 16S rRNA gene clones obtained from the root of Japanese loosestrife

| RFLP Group | Representative clone | Clone number | Authentic species (Accession No.)                            | Identity (%) | Phylum (Class)         | Length (bp) |
|------------|----------------------|--------------|--------------------------------------------------------------|--------------|------------------------|-------------|
| <u>1</u>   | JL-C5                | 5            | <i>Hyphomicrobium facile</i> subsp. <i>tolerans</i> (Y14311) | 92.90        | Proteobacteria (Alpha) | 704         |
| <u>2</u>   | JL-C59               | 1            | <i>Poalibacter uvarum</i> (AB548216)                         | 90.64        | Proteobacteria (Gamma) | 716         |
| <u>3</u>   | JL-C39               | 3            | <i>Ferruginibacter lapsinanis</i> (FJ177532)                 | 96.08        | Bacteroidetes          | 740         |
| <u>4</u>   | JL-C49               | 9            | <i>Labrys methylaminiphilus</i> (AY766152)                   | 92.87        | Proteobacteria (Alpha) | 631         |
| <u>5</u>   | JL-C41               | 7            | <i>Tepidamorphus gemmatus</i> (GU187912)                     | 91.16        | Proteobacteria (Alpha) | 735         |
| <u>6</u>   | JL-C45               | 2            | <i>Hyphomicrobium hollandicum</i> (Y14303)                   | 91.59        | Proteobacteria (Alpha) | 750         |
| <u>7</u>   | JL-C56               | 3            | <i>Methylophilus leisingeri</i> (AF250333)                   | 95.58        | Proteobacteria (Beta)  | 636         |
| <u>8</u>   | JL-C65               | 1            | <i>Methylotenera versatilis</i> (CP002056)                   | 97.01        | Proteobacteria (Beta)  | 737         |
| <u>9</u>   | JL-C63               | 1            | <i>Rubrivivax gelatinosus</i> (D16213)                       | 97.76        | Proteobacteria (Beta)  | 715         |
| <u>10</u>  | JL-C9                | 3            | <i>Azohydromonas lata</i> (D88007)                           | 97.80        | Proteobacteria (Beta)  | 636         |
| <u>11</u>  | JL-C98               | 2            | <i>Rhizobacter fulvus</i> (AB245356)                         | 99.03        | Proteobacteria (Beta)  | 720         |
| <u>12</u>  | JL-C71               | 1            | <i>Nitrosospira lacus</i> (CAUA01000011)                     | 90.51        | Proteobacteria (Beta)  | 728         |
| <u>13</u>  | JL-C73               | 2            | <i>Paludibaculum fermentans</i> (KJ461654)                   | 90.36        | Acidobacteria          | 726         |
| <u>14</u>  | JL-C74               | 1            | <i>Blastobacter capsulatus</i> (X73042)                      | 98.20        | Proteobacteria (Alpha) | 724         |
| <u>15</u>  | JL-C7                | 4            | <i>Phreatobacter oligotrophus</i> (HE616165)                 | 95.60        | Proteobacteria (Alpha) | 637         |
| <u>16</u>  | JL-C11               | 3            | <i>Novosphingobium lentum</i> (AJ303009)                     | 98.57        | Proteobacteria (Alpha) | 631         |
| <u>17</u>  | JL-C104              | 1            | <i>Bdellovibrio bacteriovorus</i> (BX842601)                 | 93.89        | Proteobacteria (Delta) | 720         |
| <u>18</u>  | JL-C12               | 2            | <i>Bradyrhizobium lablabi</i> (GU433448)                     | 100          | Proteobacteria (Alpha) | 638         |
| <u>19</u>  | JL-C83               | 2            | <i>Hyphomicrobium facile</i> subsp. <i>tolerans</i> (Y14311) | 96.50        | Proteobacteria (Alpha) | 742         |
| <u>20</u>  | JL-C6                | 2            | <i>Hyphomicrobium zavarzini</i> (KB911255)                   | 94.56        | Proteobacteria (Alpha) | 735         |
| <u>21</u>  | JL-C91               | 1            | <i>Sphingorhabdus rigui</i> (HQ436492)                       | 95.99        | Proteobacteria (Alpha) | 724         |
| <u>22</u>  | JL-C69               | 2            | <i>Steroidobacter denitrificans</i> (EF605262)               | 88.35        | Proteobacteria (Gamma) | 721         |
| <u>23</u>  | JL-C38               | 5            | <i>Thioalbus denitrificans</i> (EU837269)                    | 88.85        | Proteobacteria (Gamma) | 628         |
| <u>24</u>  | JL-C87               | 1            | <i>Gimesia maris</i> (ABCE01000043)                          | 86.55        | Planctomycetes         | 715         |
| <u>25</u>  | JL-C93               | 2            | <i>Ensifer kostiensis</i> (AM181748)                         | 97.66        | Proteobacteria (Alpha) | 725         |
| <u>26</u>  | JL-C92               | 1            | <i>Aquincola tertiaricarbonis</i> (DQ656489)                 | 96.39        | Proteobacteria (Beta)  | 721         |
| <u>27</u>  | JL-C97               | 1            | <i>Ferruginibacter lapsinanis</i> (FJ177532)                 | 96.80        | Bacteroidetes          | 719         |
| <u>28</u>  | JL-C17               | 2            | <i>Rhizobium giardinii</i> (ARBG01000149)                    | 97.82        | Proteobacteria (Alpha) | 734         |
| <u>29</u>  | JL-C114              | 1            | <i>Rhizobium endophyticum</i> (EU867317)                     | 99.71        | Proteobacteria (Alpha) | 684         |
| <u>30</u>  | JL-C48               | 1            | <i>Methylobacterium marchantiae</i> (FJ157976)               | 90.25        | Proteobacteria (Alpha) | 636         |
| <u>31</u>  | JL-C110              | 2            | <i>Portibacter lacus</i> (AB675658)                          | 87.22        | Bacteroidetes          | 713         |
| <u>32</u>  | JL-C111              | 1            | <i>Filomicrobium fusiforme</i> (Y14313)                      | 94.58        | Proteobacteria (Alpha) | 720         |
| <u>33</u>  | JL-C106              | 1            | <i>Aciditerrimonas ferrireducens</i> (AB517669)              | 89.66        | Actinobacteria         | 725         |
| <u>34</u>  | JL-C112              | 1            | <i>Hyphomicrobium facile</i> subsp. <i>tolerans</i> (Y14311) | 97.79        | Proteobacteria (Alpha) | 725         |
| <u>35</u>  | JL-C117              | 1            | <i>Parasegetibacter terrae</i> (KJ634465)                    | 91.69        | Bacteroidetes          | 698         |
| <u>36</u>  | JL-C119              | 1            | <i>Thermogutta hypogea</i> (KC867695)                        | 85.01        | Planctomycetes         | 727         |
| <u>37</u>  | JL-C120              | 1            | <i>Gemmatimonas phototrophica</i> (AUXF01000006)             | 90.73        | Gemmatimonadetes       | 701         |
| <u>38</u>  | JL-C29               | 2            | <i>Sphingomonas asaccharolytica</i> (Y09639)                 | 99.20        | Proteobacteria (Alpha) | 628         |
| <u>39</u>  | JL-C115              | 1            | <i>Gemmata obscuriglobus</i> (ABGO01000325)                  | 86.99        | Planctomycetes         | 707         |
| <u>40</u>  | JL-C1                | 4            | <i>Hyphomicrobium facile</i> subsp. <i>tolerans</i> (Y14311) | 97.23        | Proteobacteria (Alpha) | 721         |
| <u>41</u>  | JL-C3                | 1            | <i>Blastopirellula marina</i> (AANZO1000021)                 | 87.18        | Planctomycetes         | 734         |
| <u>42</u>  | JL-C4                | 1            | <i>Altererythrobacter namhicola</i> (FJ935793)               | 87.47        | Proteobacteria (Alpha) | 718         |
| <u>43</u>  | JL-C13               | 2            | <i>Alsobacter metallidurans</i> (AB231946)                   | 96.95        | Proteobacteria (Alpha) | 623         |
| <u>44</u>  | JL-C18               | 1            | <i>Ochrobactrum rhizosphaerae</i> (AM490632)                 | 87.62        | Proteobacteria (Alpha) | 719         |
| <u>45</u>  | JL-C20               | 1            | <i>Asticcacaulis excentricus</i> (CP002395)                  | 97.30        | Proteobacteria (Alpha) | 629         |
| <u>46</u>  | JL-C54               | 2            | <i>Sphingomonas suberifaciens</i> (FJ796422)                 | 97.33        | Proteobacteria (Alpha) | 750         |
| <u>47</u>  | JL-C16               | 1            | <i>Caldicoprobacter algeriensis</i> (GU216701)               | 82.20        | Acidobacteria          | 720         |
| <u>48</u>  | JL-C23               | 1            | <i>Leptothrix mobilis</i> (X97071)                           | 98.74        | Proteobacteria (Beta)  | 633         |
| <u>49</u>  | JL-C24               | 3            | <i>Blastopirellula marina</i> (AANZO1000021)                 | 88.23        | Planctomycetes         | 624         |
| <u>50</u>  | JL-C31               | 1            | <i>Caulobacter daechungensis</i> (JX861096)                  | 95.91        | Proteobacteria (Alpha) | 635         |
| <u>51</u>  | JL-C32               | 1            | <i>Arachidicoccus rhizosphaerae</i> (EU672808)               | 89.42        | Bacteroidetes          | 737         |
| <u>52</u>  | JL-C8                | 2            | <i>Thiopfundum lithotrophicum</i> (AB468957)                 | 89.30        | Proteobacteria (Gamma) | 626         |
| <u>53</u>  | JL-C14               | 1            | <i>Haliscomenobacter hydrossis</i> (CP002691)                | 84.65        | Bacteroidetes          | 749         |
| <u>54</u>  | JL-C15               | 1            | <i>Methyloferula stellata</i> (ARWA01000001)                 | 96.90        | Proteobacteria (Alpha) | 741         |
| <u>55</u>  | JL-C21               | 1            | <i>Methylosoma difficile</i> (DQ119050)                      | 92.90        | Proteobacteria (Gamma) | 635         |
| <u>56</u>  | JL-C19               | 1            | <i>Flavitalea populi</i> (HM130561)                          | 95.66        | Bacteroidetes          | 760         |

**Table S1.** Phylogenetic affiliations of 16S rRNA gene clones obtained from the root of Japanese loosestrife (*continued*)

| RFLP Group | Representative clone | Clone number | Authentic species (Accession No.)               | Identity (%) | Phylum (Class)                | Length (bp) |
|------------|----------------------|--------------|-------------------------------------------------|--------------|-------------------------------|-------------|
| <u>57</u>  | JL-C22               | 1            | <i>Methylophilus leisingeri</i> (AF250333)      | 94.70        | <i>Proteobacteria</i> (Beta)  | 741         |
| <u>58</u>  | JL-C26               | 1            | <i>Denitratisoma oestradiolicum</i> (AY879297)  | 91.27        | <i>Proteobacteria</i> (Beta)  | 733         |
| <u>59</u>  | JL-C27               | 1            | <i>Tepidisphaera mucosa</i> (KM036168)          | 84.85        | <i>Planctomycetes</i>         | 628         |
| <u>60</u>  | JL-C30               | 1            | <i>Methylocapsa aurea</i> (JQKO01000009)        | 97.70        | <i>Proteobacteria</i> (Alpha) | 739         |
| <u>61</u>  | JL-C37               | 1            | <i>Anaeromyxobacter dehalogenans</i> (CP001359) | 84.58        | <i>Proteobacteria</i> (Delta) | 720         |
| <u>62</u>  | JL-C51               | 1            | <i>Methylovirgula ligni</i> (FM252034)          | 94.13        | <i>Proteobacteria</i> (Alpha) | 698         |
| <u>63</u>  | JL-C52               | 1            | <i>Rubrivivax gelatinosus</i> (D16213)          | 97.20        | <i>Proteobacteria</i> (Beta)  | 715         |
| <u>64</u>  | JL-C64               | 1            | <i>Novosphingobium lentum</i> (AJ303009)        | 95.98        | <i>Proteobacteria</i> (Alpha) | 697         |
| <u>65</u>  | JL-C72               | 1            | <i>Paludibaculum fermentans</i> (KJ461654)      | 90.69        | <i>Acidobacteria</i>          | 698         |
| <u>66</u>  | JL-C79               | 1            | <i>Nitrospira lacus</i> (CAUA01000011)          | 91.93        | <i>Proteobacteria</i> (Beta)  | 715         |
| <u>67</u>  | JL-C77               | 1            | <i>Amorphus orientalis</i> (FJ998414)           | 93.79        | <i>Proteobacteria</i> (Alpha) | 698         |
| <u>68</u>  | JL-C88               | 1            | <i>Bdellovibrio bacteriovorus</i> (BX842601)    | 87.32        | <i>Proteobacteria</i> (Delta) | 696         |
| <u>69</u>  | JL-C90               | 1            | <i>Paludibaculum fermentans</i> (KJ461654)      | 91.11        | <i>Acidobacteria</i>          | 686         |
| <u>70</u>  | JL-C113              | 1            | <i>Zoogloea oleivorans</i> (KF667502)           | 90.11        | <i>Proteobacteria</i> (Beta)  | 708         |

122

The RFLP group whose sequences showed less than 95% identity with those of authentic species were underlined.

**Table S2.** Isolates and their related authentic species based on the sequence of 16S rRNA gene

| RFLP group | STD                   |            | DMC-1 week            |            | DMC-2 weeks           |             | DMC-3 weeks           |            | DMC-4 weeks           |            | DFC                   |            | Authentic species (Accession No.)                      | Identity (%) | Phylum (Class)                | Length (bp) |
|------------|-----------------------|------------|-----------------------|------------|-----------------------|-------------|-----------------------|------------|-----------------------|------------|-----------------------|------------|--------------------------------------------------------|--------------|-------------------------------|-------------|
|            | Representative strain | Strain No. | Representative strain | Strain No. | Representative strain | Strain No.  | Representative strain | Strain No. | Representative strain | Strain No. | Representative strain | Strain No. |                                                        |              |                               |             |
| 1          | LA-STD1               | 1          |                       |            |                       |             |                       |            | LA-DMC-4W1            | 4          |                       |            | <i>Pelomonas saccharophila</i> (AB021407)              | 99.34        | <i>Proteobacteria</i> (Beta)  | 760         |
| 2          | LA-STD2               | 1          | LA-DMC-1W25           | 1          |                       |             |                       |            |                       |            |                       |            | <i>Chelatovorus multitrophus</i> (EF457243)            | 91.31        | <i>Proteobacteria</i> (Alpha) | 771         |
| 3          | LA-STD4               | 3          |                       |            |                       |             |                       |            |                       |            |                       |            | <i>Devosia albogilva</i> (EF433460)                    | 90.22        | <i>Proteobacteria</i> (Alpha) | 767         |
| 4          | LA-STD5               | 4          |                       |            |                       |             |                       |            |                       |            |                       |            | <i>Novosphingobium acidiphilum</i> (D16147)            | 97.90        | <i>Proteobacteria</i> (Alpha) | 762         |
| 5          | LA-STD6               | 3          |                       |            |                       |             |                       |            |                       |            |                       |            | <i>Tepidamorphus gemmatus</i> (GU187912)               | 90.96        | <i>Proteobacteria</i> (Alpha) | 774         |
| 6          | LA-STD8               | 1          |                       |            |                       |             |                       |            |                       |            |                       |            | <i>Hyphomicrobium hollandicum</i> (Y14303)             | 90.64        | <i>Proteobacteria</i> (Alpha) | 781         |
| 7          | LA-STD9               | 2          |                       |            |                       |             |                       |            |                       |            |                       |            | <i>Niastella jeongjuensis</i> (DQ244076)               | 95.06        | <i>Bacteroidetes</i>          | 770         |
| 8          | LA-STD10              | 1          |                       |            |                       |             |                       |            |                       |            |                       |            | <i>Rhizobacter dauci</i> (AB297965)                    | 98.93        | <i>Proteobacteria</i> (Beta)  | 755         |
| 9          | LA-STD11              | 3          |                       |            |                       |             |                       |            |                       |            |                       |            | <i>Leptothrix mobilis</i> (X97071)                     | 96.03        | <i>Proteobacteria</i> (Beta)  | 755         |
| 10         | LA-STD17              | 1          |                       |            |                       |             |                       |            |                       |            |                       |            | <i>Novosphingobium lindaniclasticum</i> (ATHL01000125) | 97.80        | <i>Proteobacteria</i> (Alpha) | 772         |
| 11         | LA-STD18              | 1          |                       |            |                       |             |                       |            |                       |            |                       |            | <i>Hyphomicrobium hollandicum</i> (Y14303)             | 90.68        | <i>Proteobacteria</i> (Alpha) | 763         |
| 12         | LA-STD19              | 1          |                       |            |                       |             |                       |            |                       |            |                       |            | <i>Ideonella dechloratans</i> (D16213)                 | 96.99        | <i>Proteobacteria</i> (Beta)  | 768         |
| 13         | LA-STD20              | 1          |                       |            |                       |             |                       |            |                       |            |                       |            | <i>Rubrivivax gelatinosus</i> (D16213)                 | 97.55        | <i>Proteobacteria</i> (Beta)  | 776         |
| 14         | LA-STD22              | 1          |                       |            |                       |             |                       |            |                       |            |                       |            | <i>Asticcacaulis benevestitus</i> (AM087199)           | 97.81        | <i>Proteobacteria</i> (Alpha) | 778         |
| 15         | LA-STD23              | 2          |                       |            |                       |             |                       |            |                       |            |                       |            | <i>Hyphomicrobium hollandicum</i> (Y14303)             | 91.49        | <i>Proteobacteria</i> (Alpha) | 777         |
| 16         | LA-STD24              | 1          |                       |            |                       |             |                       |            |                       |            |                       |            | <i>Flavitalea populi</i> (HM130561)                    | 93.89        | <i>Bacteroidetes</i>          | 737         |
| 17         | LA-STD25              | 1          |                       |            |                       |             |                       |            |                       |            |                       |            | <i>Opitutus terrae</i> (CP001032)                      | 93.03        | <i>Verrucomicrobia</i>        | 746         |
| 18         | LA-STD26              | 1          |                       |            |                       |             |                       |            |                       |            |                       |            | <i>Niastella populi</i> (EU877262)                     | 92.96        | <i>Bacteroidetes</i>          | 753         |
| 19         | LA-STD28              | 1          |                       |            |                       |             |                       |            |                       |            |                       |            | <i>Aquincola tertiaricarbonis</i> (DQ656489)           | 96.27        | <i>Proteobacteria</i> (Beta)  | 750         |
| 20         |                       |            | LA-DMC-1W1            | 1          | LA-DMC-2W12           | 3           |                       |            | LA-DMC-4W15           | 1          |                       |            | <i>Methylophilus rhizosphaerae</i> (EU194887)          | 98.29        | <i>Proteobacteria</i> (Beta)  | 819         |
| 21         |                       |            | LA-DMC-1W2            | 1          |                       |             |                       |            |                       |            |                       |            | <i>Rhizobium sullae</i> (Y10170)                       | 97.95        | <i>Proteobacteria</i> (Alpha) | 783         |
| 22         |                       |            | LA-DMC-1W4            | 2          |                       |             |                       |            |                       |            |                       |            | <i>Novosphingobium sediminicola</i> (FJ177534)         | 97.02        | <i>Proteobacteria</i> (Alpha) | 739         |
| 23         |                       |            | LA-DMC-1W5            | 1          | LA-DMC-2W1            | 2           | LA-DMC-3W9            | 4          |                       |            |                       |            | <i>Flavobacterium fontis</i> (JN873147)                | 98.21        | <i>Bacteroidetes</i>          | 781         |
| 24         |                       |            | LA-DMC-1W7            | 2          |                       |             |                       |            |                       |            |                       |            | <i>Rhizobium rosettiformans</i> (EU781656)             | 98.49        | <i>Proteobacteria</i> (Alpha) | 793         |
| 25         |                       |            | LA-DMC-1W8            | 1          |                       |             |                       |            |                       |            |                       |            | <i>Azospirillum doebereineriae</i> (AJ238567)          | 96.46        | <i>Proteobacteria</i> (Alpha) | 831         |
| 26         |                       |            | LA-DMC-1W9            | 2          |                       |             |                       |            |                       |            |                       |            | <i>Heliomonas saccharivorans</i> (JX458466)            | 94.68        | <i>Bacteroidetes</i>          | 790         |
| 27         |                       |            | LA-DMC-1W12           | 1          |                       |             |                       |            | LA-DMC-4W17           | 3          |                       |            | <i>Piscinibacter aquaticus</i> (DQ664244)              | 99.23        | <i>Proteobacteria</i> (Beta)  | 782         |
| 28         |                       |            | LA-DMC-1W13           | 1          |                       |             |                       |            |                       |            |                       |            | <i>Flavobacterium aquidurensense</i> (AM177392)        | 97.48        | <i>Bacteroidetes</i>          | 794         |
| 29         |                       |            | LA-DMC-1W14           | 1          |                       | LA-DMC-3W29 | 2                     |            |                       |            |                       |            | <i>Aquincola tertiaricarbonis</i> (DQ656489)           | 97.96        | <i>Proteobacteria</i> (Beta)  | 792         |
| 30         |                       |            | LA-DMC-1W17           | 1          | LA-DMC-2W9            | 1           |                       |            |                       |            |                       |            | <i>Asticcacaulis benevestitus</i> (AQWM01000073)       | 98.72        | <i>Proteobacteria</i> (Alpha) | 785         |
| 31         |                       |            | LA-DMC-1W15           | 1          |                       |             |                       |            |                       |            |                       |            | <i>Cystobacter gracilis</i> (DQ768110)                 | 91.74        | <i>Proteobacteria</i> (Delta) | 873         |
| 32         |                       |            | LA-DMC-1W19           | 1          |                       |             |                       |            |                       |            |                       |            | <i>Phreatobacter oligotrophus</i> (HE616165)           | 93.55        | <i>Proteobacteria</i> (Alpha) | 807         |
| 33         |                       |            | LA-DMC-1W20           | 1          |                       |             |                       |            |                       |            |                       |            | <i>Herbaspirillum aquaticum</i> (FJ267649)             | 99.62        | <i>Proteobacteria</i> (Beta)  | 801         |
| 34         |                       |            | LA-DMC-1W21           | 4          | LA-DMC-2W22           | 4           | LA-DMC-3W17           | 2          |                       |            |                       |            | <i>Sediminibacterium salmoneum</i> (K1866530)          | 94.03        | <i>Bacteroidetes</i>          | 737         |
| 35         |                       |            | LA-DMC-1W22           | 1          | LA-DMC-2W27           | 3           |                       |            |                       |            |                       |            | <i>Pseudomonas taiwanensis</i> (EU103629)              | 97.96        | <i>Proteobacteria</i> (Gamma) | 786         |
| 36         |                       |            | LA-DMC-1W23           | 1          |                       |             |                       |            |                       |            |                       |            | <i>Paucimonas lemoignei</i> (X92554)                   | 92.26        | <i>Proteobacteria</i> (Beta)  | 776         |
| 37         |                       |            | LA-DMC-1W26           | 2          | LA-DMC-2W21           | 1           |                       |            |                       |            |                       |            | <i>Luteolibacter pohnpneiensis</i> (KP101281)          | 94.98        | <i>Verrucomicrobia</i>        | 737         |
| 38         |                       |            | LA-DMC-1W27           | 1          | LA-DMC-2W15           | 1           | LA-DMC-3W23           | 1          | LA-DMC-4W29           | 17         |                       |            | <i>Flectobacillus roseus</i> (EU420062)                | 99.59        | <i>Bacteroidetes</i>          | 772         |

**Table S2.** Isolates and their related authentic species based on the sequence of 16S rRNA gene (continued)

| RFLP group | STD                   |            | DMC-1 week            |            | DMC-2 weeks           |            | DMC-3 weeks           |            | DMC-4 weeks           |            | DFC                   |            | Authentic species (Accession No.)                 | Identity (%) | Phylum (Class)                | Length (bp) |
|------------|-----------------------|------------|-----------------------|------------|-----------------------|------------|-----------------------|------------|-----------------------|------------|-----------------------|------------|---------------------------------------------------|--------------|-------------------------------|-------------|
|            | Representative strain | Strain No. | Representative strain | Strain No. | Representative strain | Strain No. | Representative strain | Strain No. | Representative strain | Strain No. | Representative strain | Strain No. |                                                   |              |                               |             |
| 39         |                       |            | LA-DMC-1W11           | 1          |                       |            |                       |            |                       |            |                       |            | <i>Novosphingobium aromaticivorans</i> (CP000248) | 97.83        | <i>Proteobacteria</i> (Alpha) | 739         |
| 40         |                       |            | LA-DMC-1W24           | 1          |                       |            |                       |            |                       |            |                       |            | <i>Pseudoduganella violaceinigra</i> (AY376163)   | 98.24        | <i>Proteobacteria</i> (Beta)  | 738         |
| 41         |                       |            | LA-DMC-1W3            | 1          |                       |            |                       |            |                       |            |                       |            | <i>Bradyrhizobium erythrophlei</i> (KF114645)     | 99.73        | <i>Proteobacteria</i> (Alpha) | 740         |
| 42         |                       |            |                       |            | LA-DMC-2W11           | 1          |                       |            |                       |            |                       |            | <i>Ideonella azotifigens</i> (EU542576)           | 98.12        | <i>Proteobacteria</i> (Beta)  | 747         |
| 43         |                       |            |                       |            | LA-DMC-2W17           | 3          |                       |            |                       |            |                       |            | <i>Pelomonas saccharophila</i> (AB021407)         | 99.59        | <i>Proteobacteria</i> (Beta)  | 735         |
| 44         |                       |            |                       |            | LA-DMC-2W19           | 1          |                       |            |                       |            |                       |            | <i>Methylophilus flavus</i> (FJ872108)            | 98.37        | <i>Proteobacteria</i> (Beta)  | 738         |
| 45         |                       |            |                       |            | LA-DMC-2W20           | 2          |                       |            |                       |            |                       |            | <i>Phenylobacterium conjunctum</i> (AJ227767)     | 97.97        | <i>Proteobacteria</i> (Alpha) | 738         |
| 46         |                       |            |                       |            | LA-DMC-2W23           | 1          |                       |            |                       |            |                       |            | <i>Alsobacter metallidurans</i> (AB231946)        | 96.34        | <i>Proteobacteria</i> (Alpha) | 738         |
| 47         |                       |            |                       |            | LA-DMC-2W26           | 2          |                       |            |                       |            |                       |            | <i>Fimbriimonas ginsengisoli</i> (CP002763)       | 92.11        | <i>Armatimonadetes</i>        | 1292        |
| 48         |                       |            |                       |            | LA-DMC-2W4            | 1          |                       |            |                       |            |                       |            | <i>Flectobacillus roseus</i> (EU420062)           | 99.59        | <i>Bacteroidetes</i>          | 737         |
| 49         |                       |            |                       |            | LA-DMC-2W5            | 1          |                       |            | LA-DMC-4W5            | 1          |                       |            | <i>Bradyrhizobium erythrophlei</i> (KF114645)     | 99.87        | <i>Proteobacteria</i> (Alpha) | 739         |
| 50         |                       |            |                       |            | LA-DMC-2W8            | 2          |                       |            |                       |            |                       |            | <i>Rhizobacter dauci</i> (AB297965)               | 99.04        | <i>Proteobacteria</i> (Beta)  | 736         |
| 51         |                       |            |                       |            | LA-DMC-2W28           | 1          | LA-DMC-3W26           | 4          |                       |            |                       |            | <i>Pelomonas saccharophila</i> (AB021407)         | 98.12        | <i>Proteobacteria</i> (Beta)  | 750         |
| 52         |                       |            |                       |            |                       |            | LA-DMC-3W1            | 1          |                       |            |                       |            | <i>Flavobacterium fontis</i> (JN873147)           | 98.37        | <i>Bacteroidetes</i>          | 738         |
| 53         |                       |            |                       |            |                       |            | LA-DMC-3W4            | 3          |                       |            |                       |            | <i>Rhizobium aggregatum</i> (X73041)              | 99.05        | <i>Proteobacteria</i> (Alpha) | 738         |
| 54         |                       |            |                       |            |                       |            | LA-DMC-3W12           | 1          |                       |            |                       |            | <i>Methylophilus methylotrophus</i> (AB193724)    | 98.93        | <i>Proteobacteria</i> (Beta)  | 839         |
| 55         |                       |            |                       |            |                       |            | LA-DMC-3W11           | 10         | LA-DMC-4W28           | 1          |                       |            | <i>Pelomonas saccharophila</i> (AB021407)         | 100          | <i>Proteobacteria</i> (Beta)  | 735         |
| 56         |                       |            |                       |            |                       |            | LA-DMC-3W14           | 1          |                       |            |                       |            | <i>Massilia namucuoensis</i> (JF799985)           | 97.25        | <i>Proteobacteria</i> (Beta)  | 836         |
| 57         |                       |            |                       |            |                       |            | LA-DMC-3W19           | 1          |                       |            |                       |            | <i>Ideonella azotifigens</i> (EU542576)           | 98.08        | <i>Proteobacteria</i> (Beta)  | 837         |
| 58         |                       |            |                       |            |                       |            |                       |            | LA-DMC-4W6            | 3          |                       |            | <i>Ideonella dechloratans</i> (X72724)            | 97.20        | <i>Proteobacteria</i> (Beta)  | 833         |
| 59         |                       |            |                       |            |                       |            |                       |            |                       |            | LA-DFC-4W4            | 4          | <i>Aquicola tertiarycarbonis</i> (DQ656489)       | 96.95        | <i>Proteobacteria</i> (Beta)  | 822         |
| 60         |                       |            |                       |            |                       |            |                       |            |                       |            | LA-DFC-4W15           | 1          | <i>Herbaspirillum seropedicae</i> (Y10146)        | 95.54        | <i>Proteobacteria</i> (Beta)  | 740         |
| 61         |                       |            |                       |            |                       |            |                       |            |                       |            | LA-DFC-4W30           | 25         | <i>Aquitalea magnusonii</i> (DQ018117)            | 99.39        | <i>Proteobacteria</i> (Beta)  | 819         |
| Total      |                       | 30         |                       | 30         |                       | 30         |                       | 30         |                       | 30         |                       | 30         |                                                   |              |                               |             |

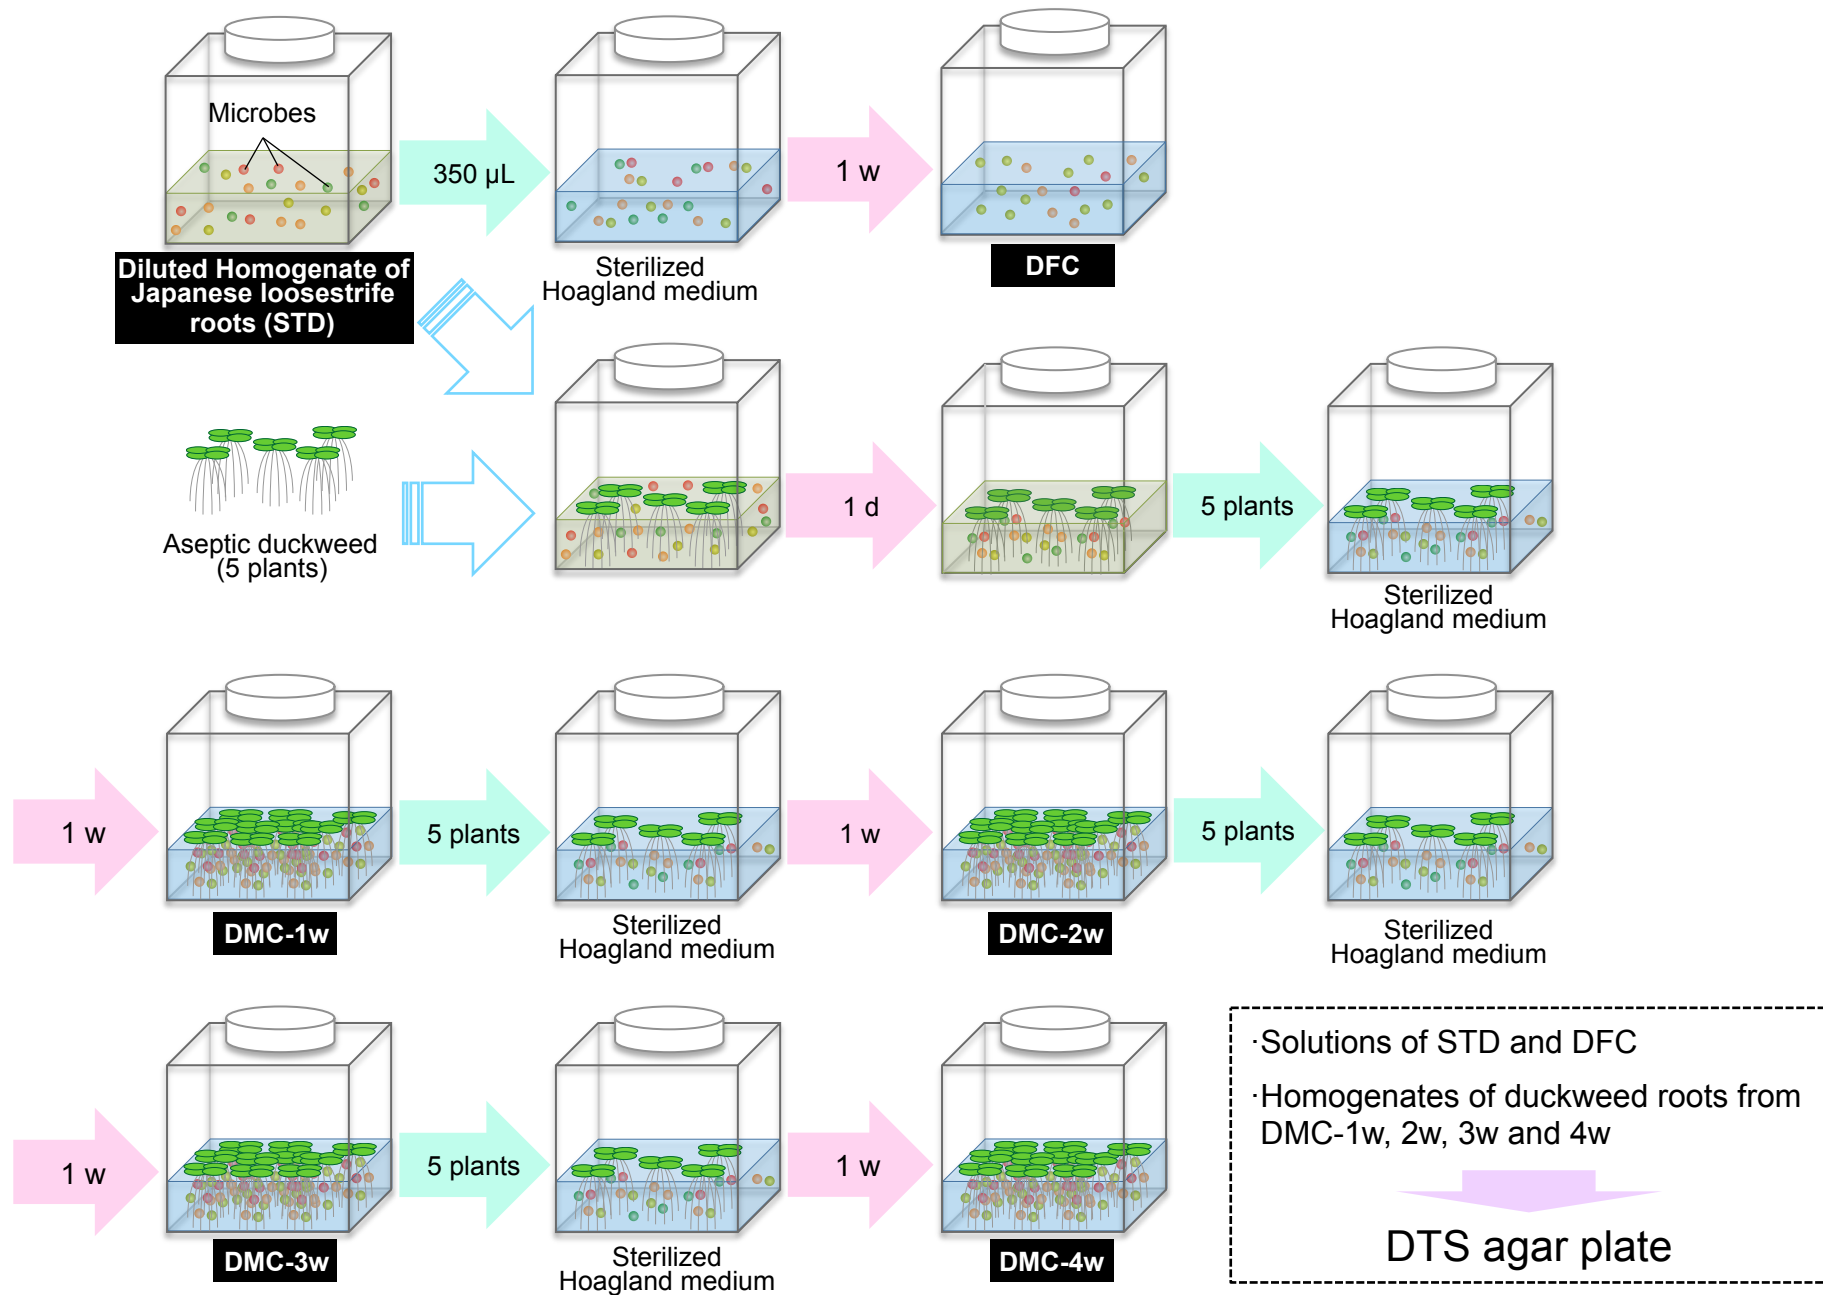

Fig. S1  
 Tanaka et al.

**Fig. S1.** Schematic image of microbial isolation methods used in the present study.
